# Supplementary material
Source: publisher site journal article supplement (https://www.dovepress.com/article/581910)
Supplement: Supplementary file 1 [file 581910%20Revised%20%2509Supplementary.docx]

**Table S1. Demographics and Clinical Characteristics of the SMCGES Serological Assessment Cohort.**

|  | **SMCGES Serological Assessment Sub-Cohort** | |
| --- | --- | --- |
|  | **Total** | **House Dust Mite (HDM) positives1** |
| **Total (n, %)** | | 736 | 476 |
| **Age** (Year, Mean ± 1SD) | | 21.72 ± 5.89 | 21.19 ± 4.15 |
| **Gender:** Male (*n*, %) | | 309 (42.0) | 235 (49.4) |
| Female (*n*, %) | | 411 (55.8) | 232 (48.7) |
| **Ethnic** (Chinese*n*, %) | | 448 (60.9) | 316 (66.4) |
| **Smoking Status:** Non-smoker(*n*, %) | | 689 (93.6) | 454 (95.4) |
| Ex-smoker(*n*, %) | | 25 (3.4) | 14 (2.9) |
| Current Smoker (*n*, %) | | 10 (1.4) | 4 (0.8) |
| **Allergic Sensitization (SPT positive)** | | - | - |
| *Blomia Tropicalis*, Blo t + (*n*, %) | | 396 (53.8) | - |
| *Dermatophagoides pteronyssinus*, Der p + (*n*, %) | | 401 (54.5) | - |
| House Dust Mites (Blo t or Der p) + (*n*, %) | | 476 (64.7) | - |
| **Asthma** | | 91 (12.4) | 71 (14.9) |
| Wheezing (past 12 months) | | 11 (1.5) | 8 (1.7) |
| Wheezing with exercise (past 12 months) | | 15 (2) | 12 (2.5) |
| Nocturnal cough (past 12 months) | | 19 (2.6) | 12 (2.5) |
| Daytime asthma attack (past 12 months) | | 9 (1.2) | 8 (1.7) |
| Nighttime asthma attack (past 12 months) | | 8 (1.1) | 6 (1.3) |
| School absenteeism due to asthma (past 12 months) | | 1 (0.1) | 0 (0) |
| General practitioner/specialist visits due to asthma (past 12 months) | | 6 (0.8) | 5 (1.1) |
| Emergency department admission due to asthma (past 12 months) | | 1 (0.1) | 1 (0.2) |
| Hospitalization due to asthma (past 12 months) | | 1 (0.1) | 1 (0.2) |
| Any exacerbation event (past 12 months)2 | | 6 (0.8) | 5 (1.1) |
| **Allergic Rhinitis** | | 311 (42.3) | 243 (51.1) |
| **Atopic Dermatitis** | | 162 (22) | 113 (23.7) |

HDM: house dust mite; SD: standard deviation; SMCGES: Singapore/Malaysia Cross-sequential Genetics and Epidemiological Study; SPT: skin prick test.

1HDM positive individuals were defined as having a positive SPT reaction to either *Blomia tropicalis* or *Dermatophagoides pteronyssinus*.

2Asthma-related exacerbation refers to at least one of the following events due to asthma in the past 12 months: school absenteeism, general practitioner/specialist visits, emergency department admission, or hospitalization.


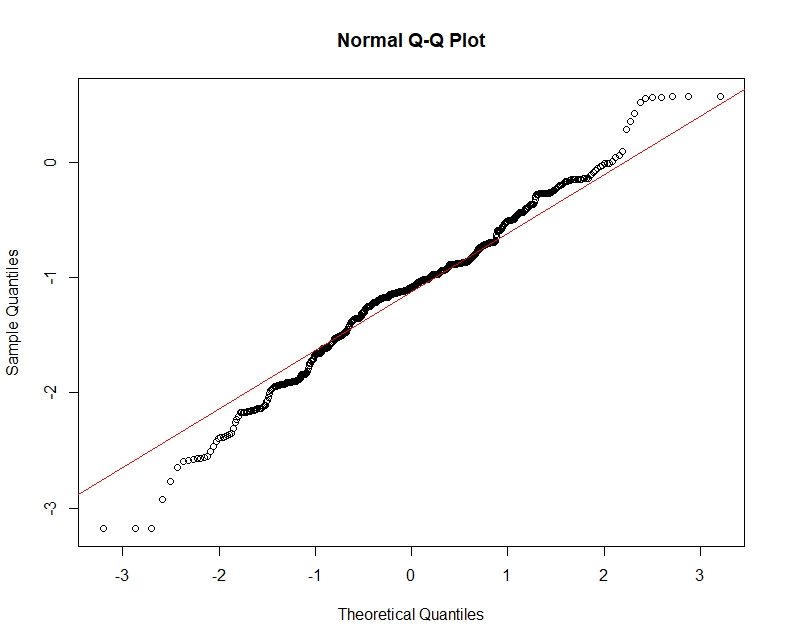


**Figure S1. Normal Q-Q plot of log10-transformed Can f 1-specific IgE levels.** The figure displays the sample quantiles of log10-transformed Can f 1-specific IgE concentrations (y-axis) plotted against the theoretical quantiles of a normal distribution (x-axis) in the SMCGES serological cohort (*n* = 736). The close alignment of the data points with the diagonal reference line indicates that the log-transformation successfully achieved a distribution suitable for parametric analysis.


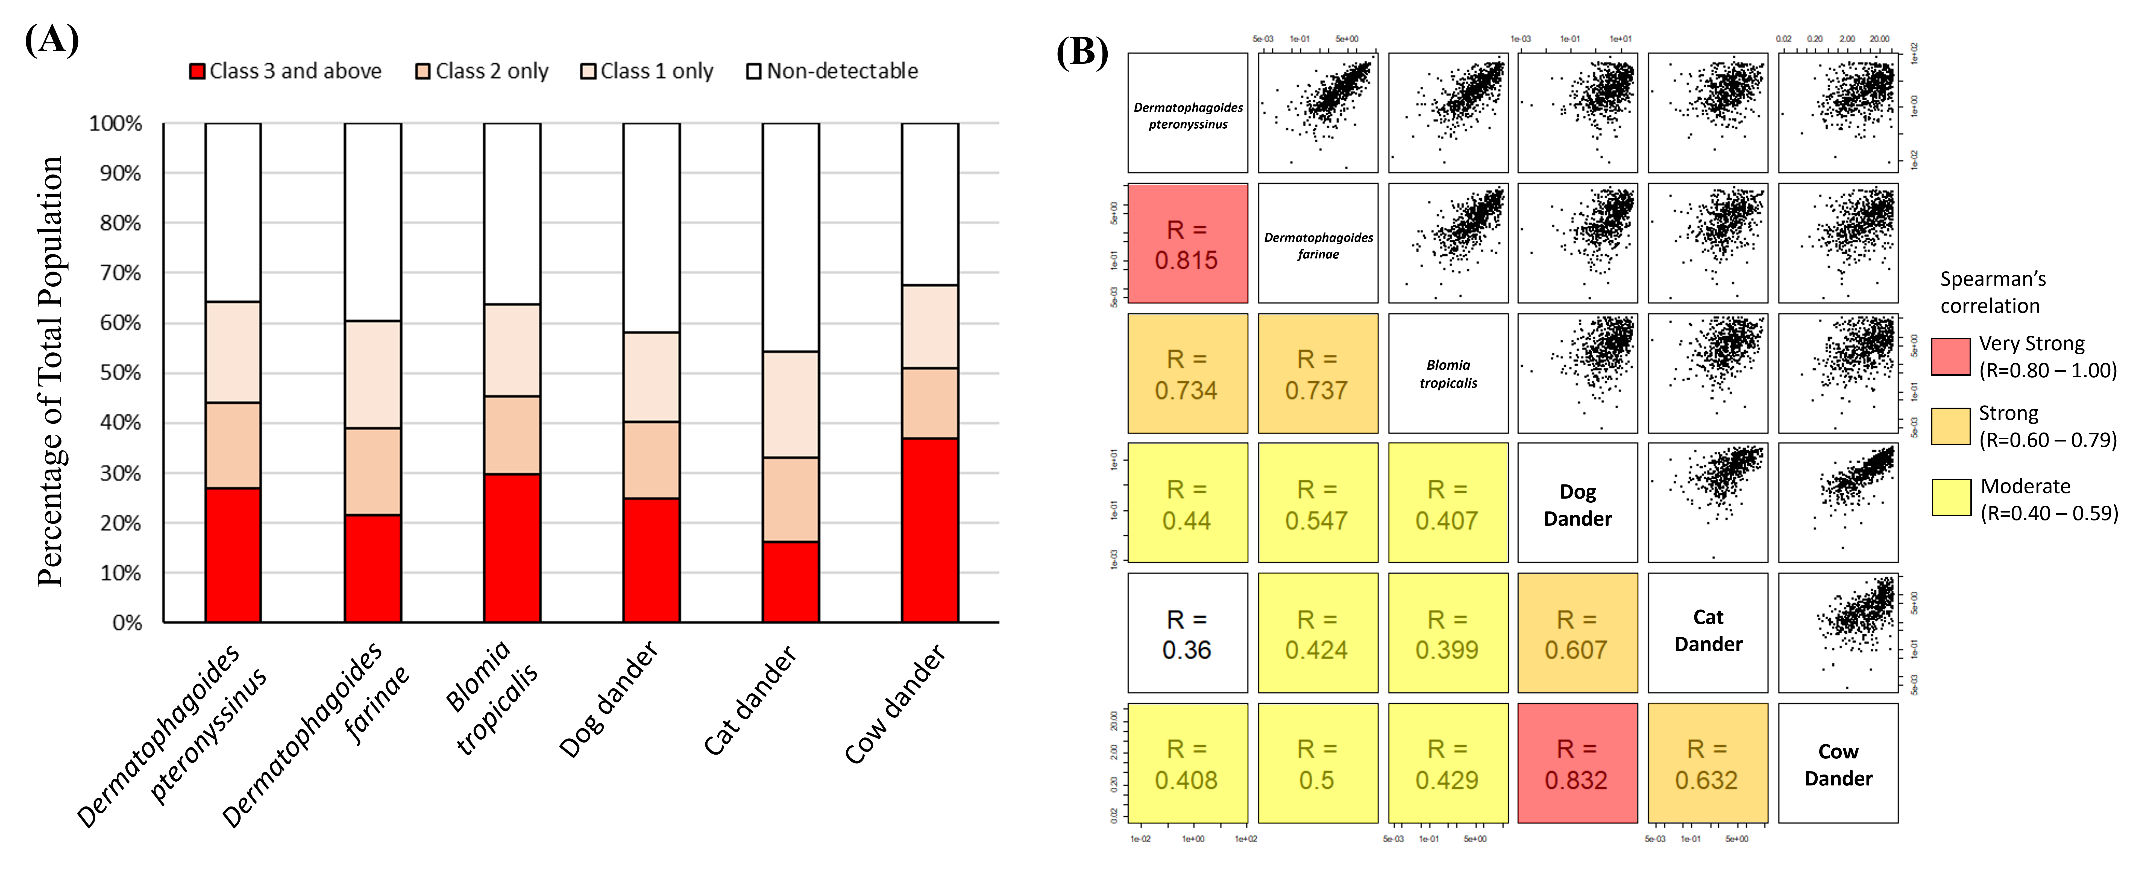


**Figure S2. Prevalence and Pairwise correlation plot of SSIgE Reactivities to Common Allergens. (A)** The percentages of population demonstrating specific IgE reactivity to common aeroallergens were classified based on ImmunoCAP-defined classes: non-detectable (SSIgE < 0.35 IU/mL); Class 1 (SSIgE 0.35–0.69 IU/mL), Class 2 (SSIgE 0.7–3.49 IU/mL), or Class 3 and above (SSIgE > 3.5 IU/mL). **(B) Upper panel:** pairwise correlation plots of SSIgE titers (IU/ml) against HDM and animal dander. **Lower panel:** Spearman correlation coefficients (R) were shown. The strength of correlation was defined as: very strong (R = 0.80 – 1.00), strong (R = 0.60 – 0.79), and moderate (R = 0.40 – 0.59). For both **(A)** and **(B)**, serological assessment was performed on a previously collected, unbiased, and consecutive serum biobank comprising 1,069 legacy serum samples from allergic patients at local hospitals in Singapore.


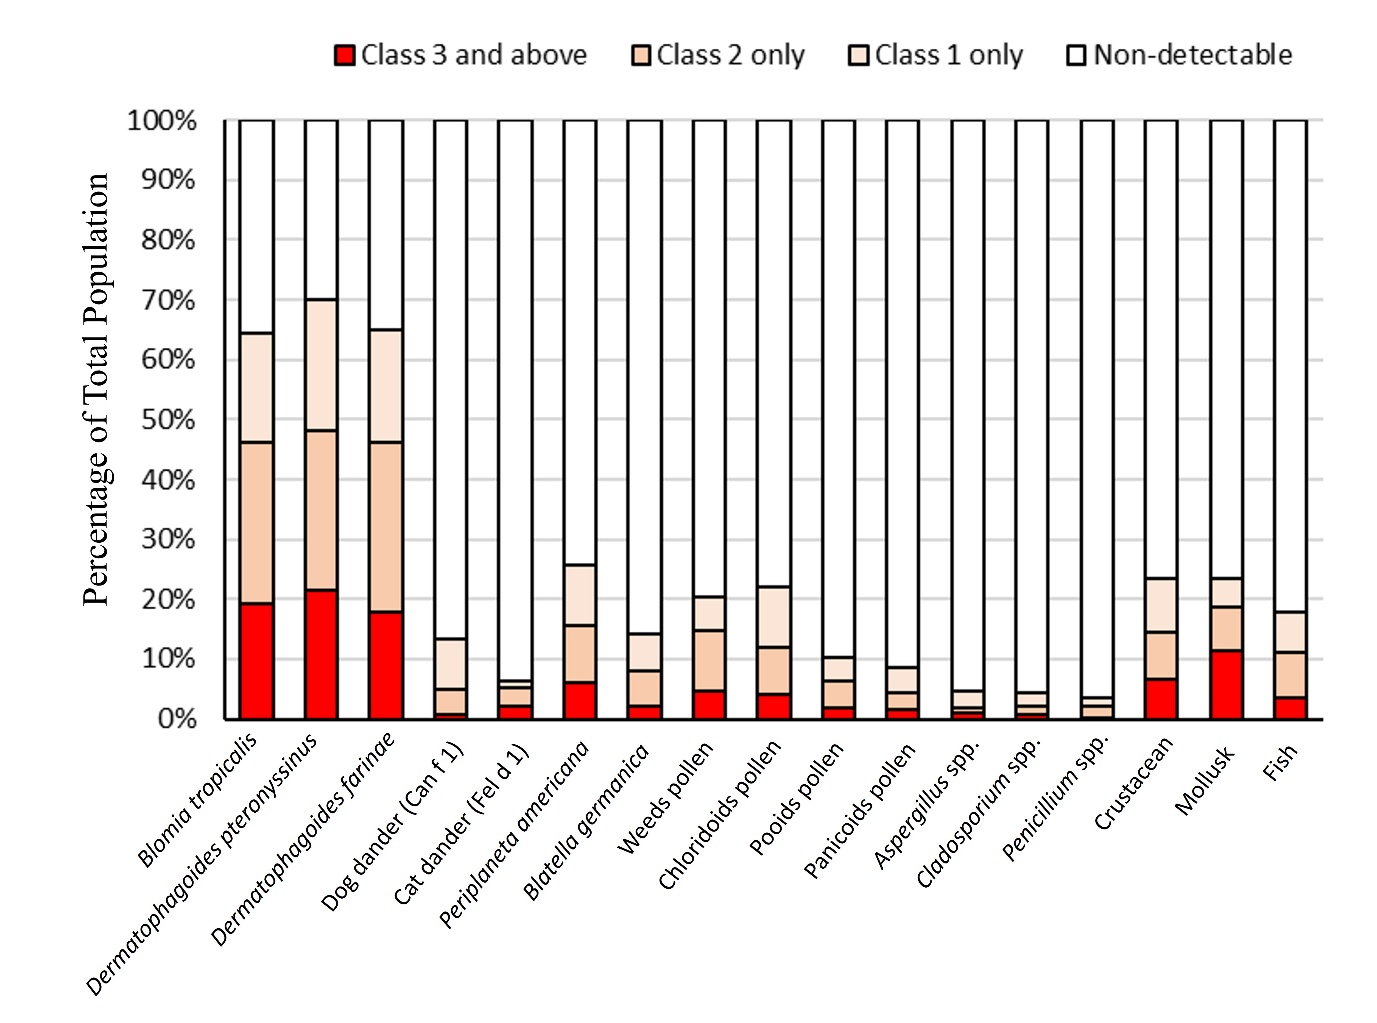


**Figure S3. Percentages of SSIgE Sensitization to Common Allergens in the SMCGES Sub-cohort.** Serological assessment was performed on 736 individuals. Specific IgE responses were classified based on ImmunoCAP-defined classes: non-detectable (SSIgE < 0.35 IU/mL); Class 1 (SSIgE 0.35–0.69 IU/mL), Class 2 (SSIgE 0.7–3.49 IU/mL), or Class 3 and above (SSIgE > 3.5 IU/mL).


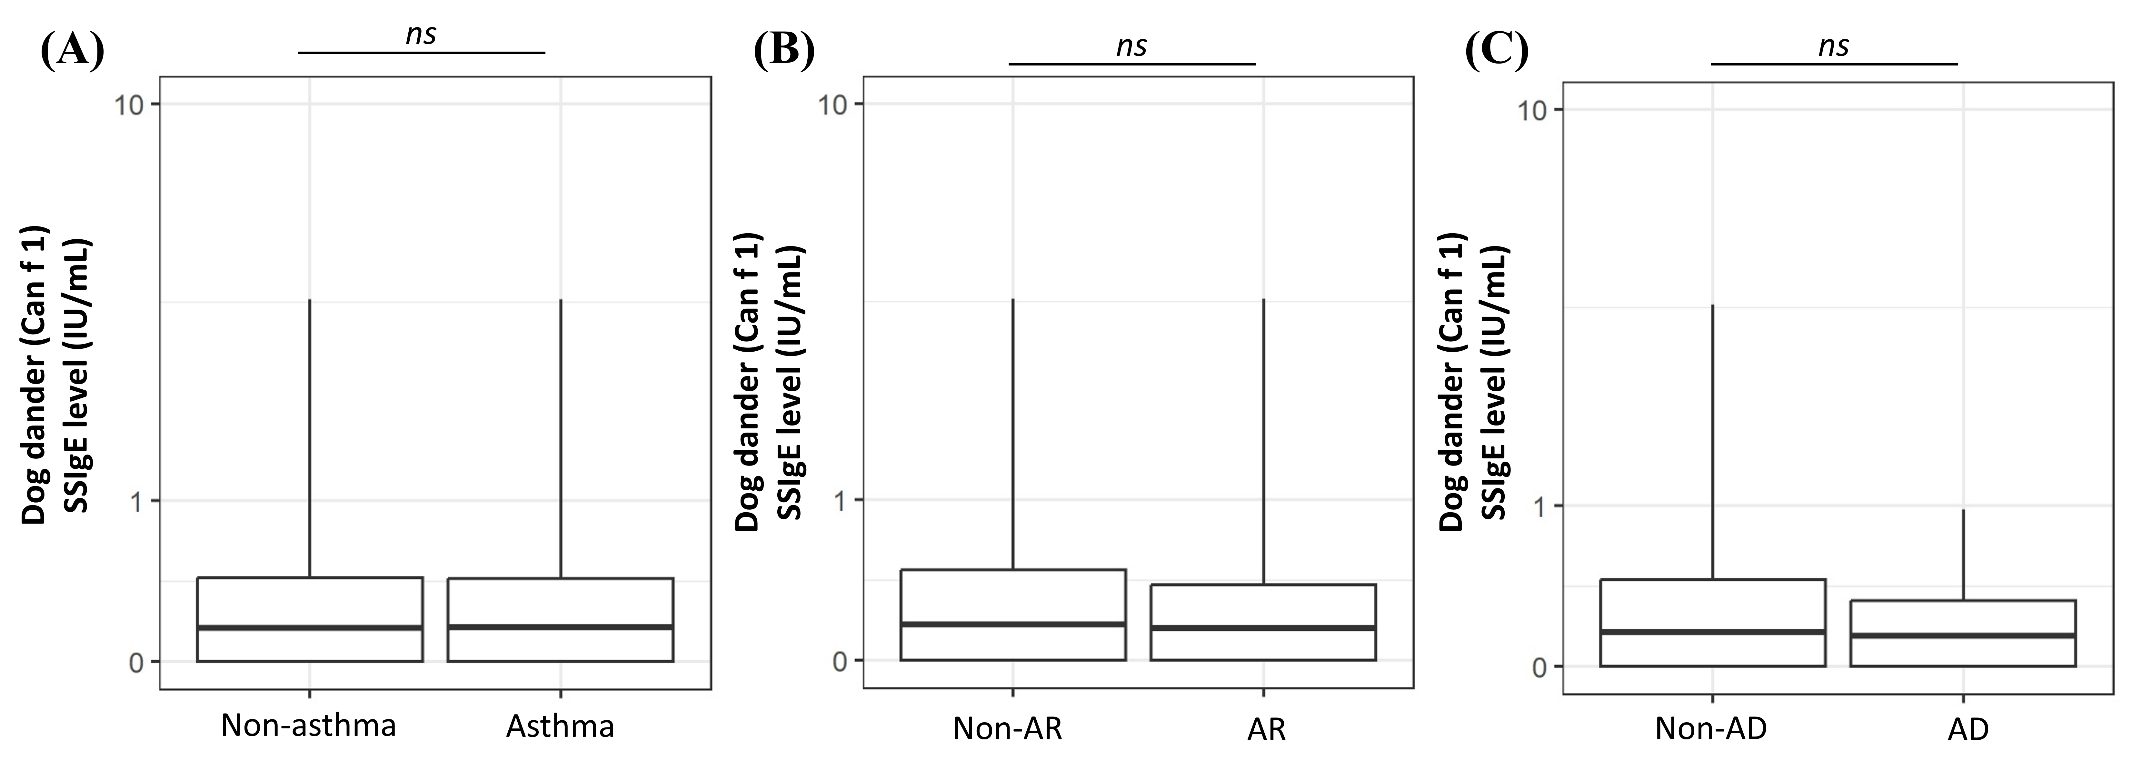


**Figure S4. Association between Dog Dander (Can f 1) SSIgE Levels and Allergic Diseases.** Associations of Can f 1 SSIgE levels with **(A)** asthma, **(B)** allergic rhinitis (AR), and **(C)** atopic dermatitis (AD) were assessed on 736 individuals from the SMCGES sub-cohort. Independent-sample t tests were performed to assess the significance of associations. *ns*: not significant (*p*>0.05).


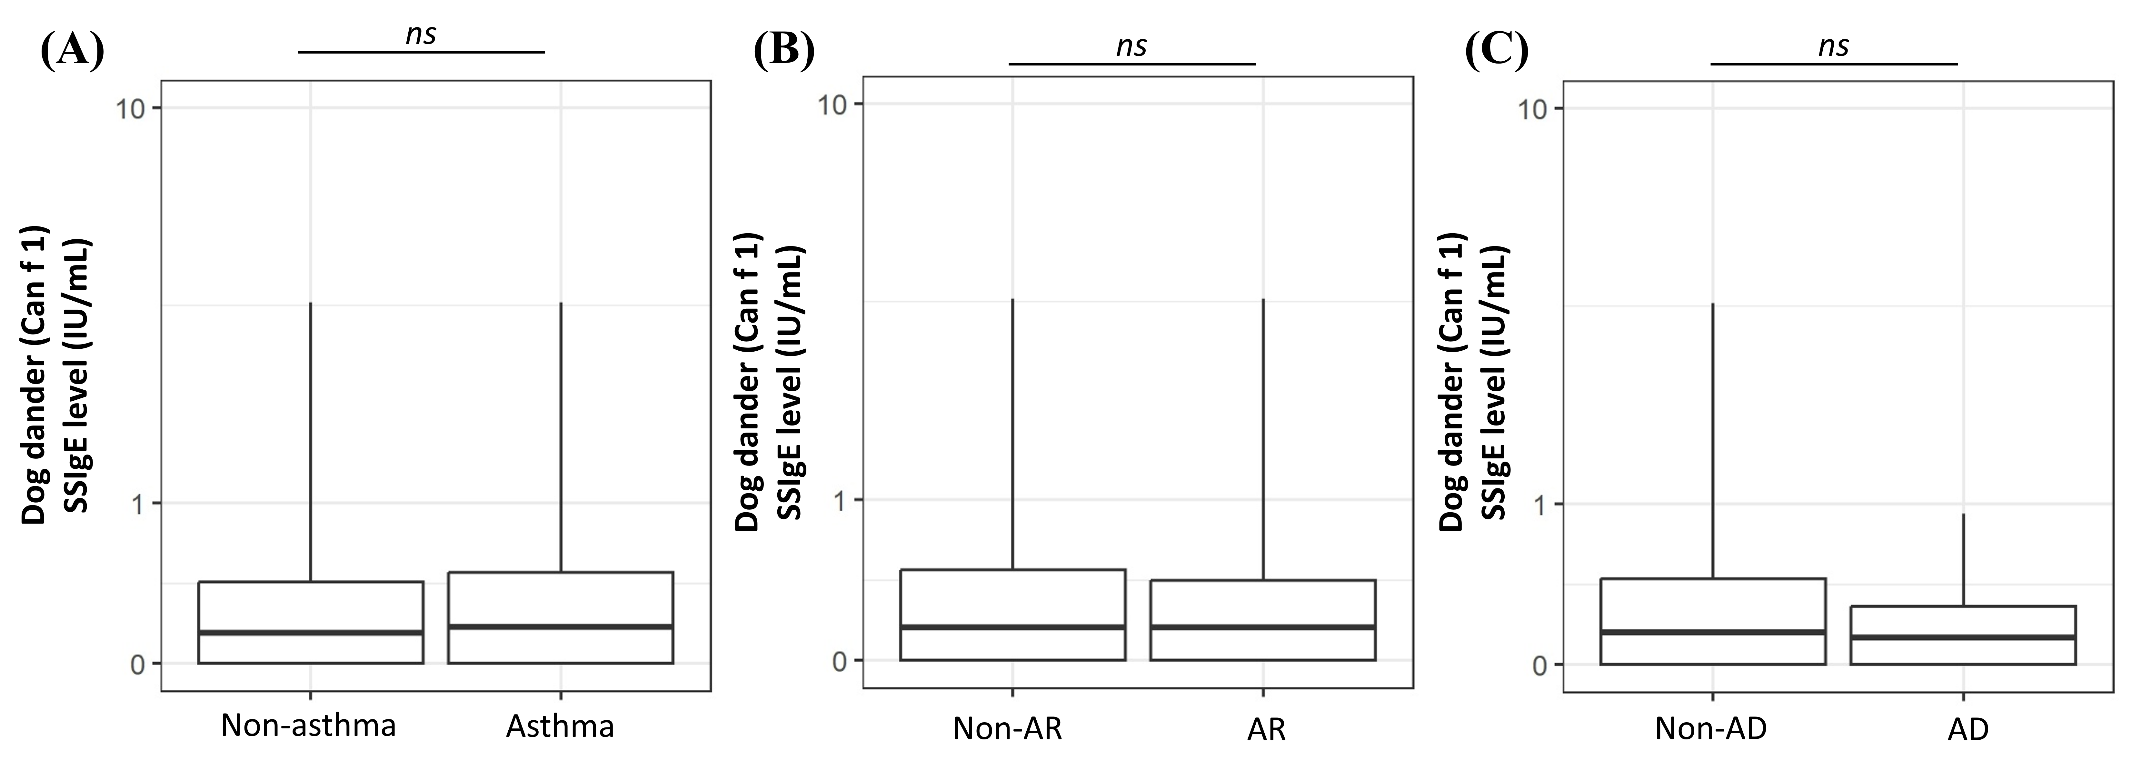


**Figure S5. Association between Dog Dander (Can f 1) SSIgE Levels and Allergic Diseases among HDM-sensitized Individuals.** Associations of Can f 1 SSIgE levels with **(A)** asthma, **(B)** allergic rhinitis (AR), and **(C)** atopic dermatitis (AD) were assessed on 476 HDM-sensitized individuals from the SMCGES sub-cohort. Independent-sample t tests were performed to assess the significance of associations. *ns*: not significant (*p*>0.05).
